# Supplementary material for: One-pot environmentally friendly amino acid mediated synthesis of N-doped graphene–silver nanocomposites with an enhanced multifunctional behavior
Source: Royal Society of Chemistry journal article supplement (doi:10.1039/c5dt04880j), 2016-01-01
Supplement: c5dt04880j1.pdf [file c5dt04880j1.pdf]

## Electronic Supplementary Information

### One-pot environmentally friendly amino acid mediated synthesis of N-doped graphene-silver nanocomposites with an enhanced multifunctional behavior

Mahima Khandelwal and Anil Kumar\*

Department of Chemistry, Indian Institute of Technology Roorkee, Roorkee-247667, India.  
E-mail: [anilkfcy@iitr.ac.in](mailto:anilkfcy@iitr.ac.in); [akmshfcy@gmail.com](mailto:akmshfcy@gmail.com)

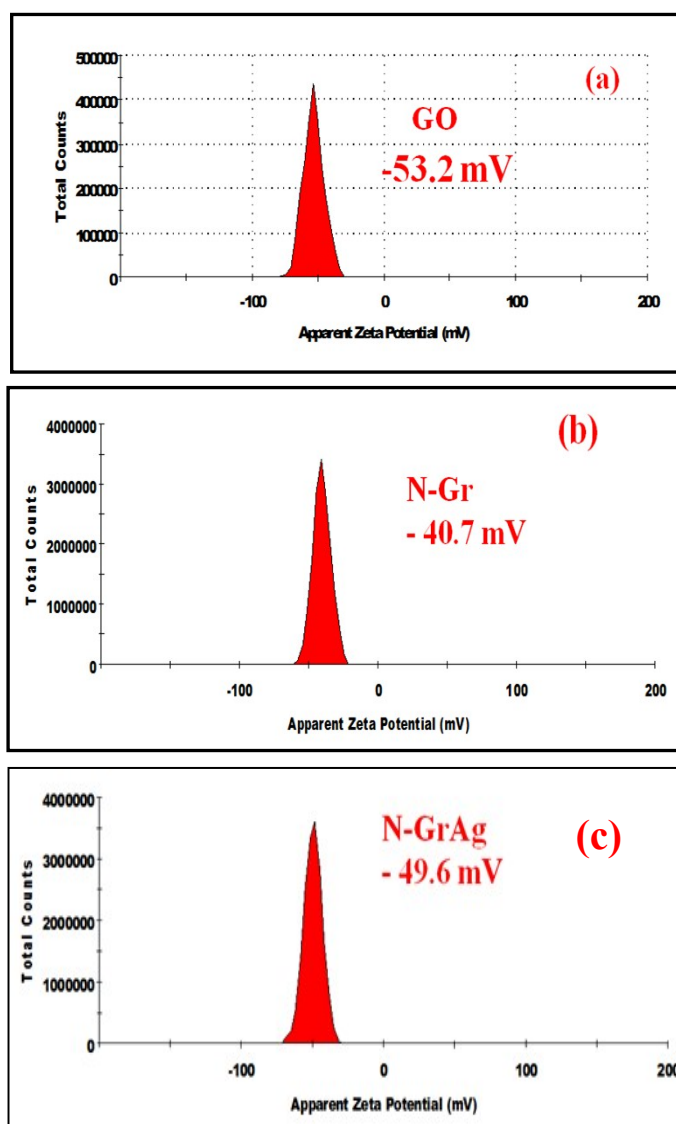

Fig. S1:  $\zeta$ -potentials of GO (a), N-Gr (b) and N-GrAg (c) in aqueous medium.

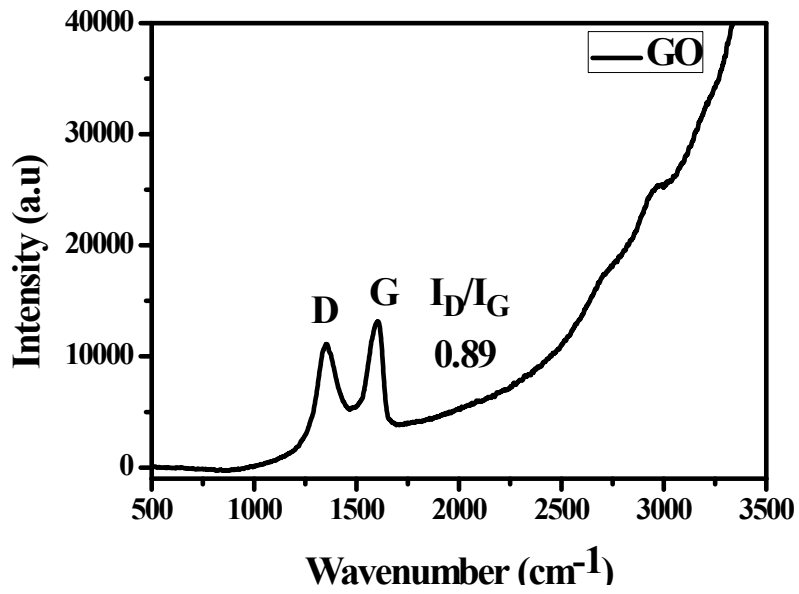

Fig. S2: Raman spectrum of GO.

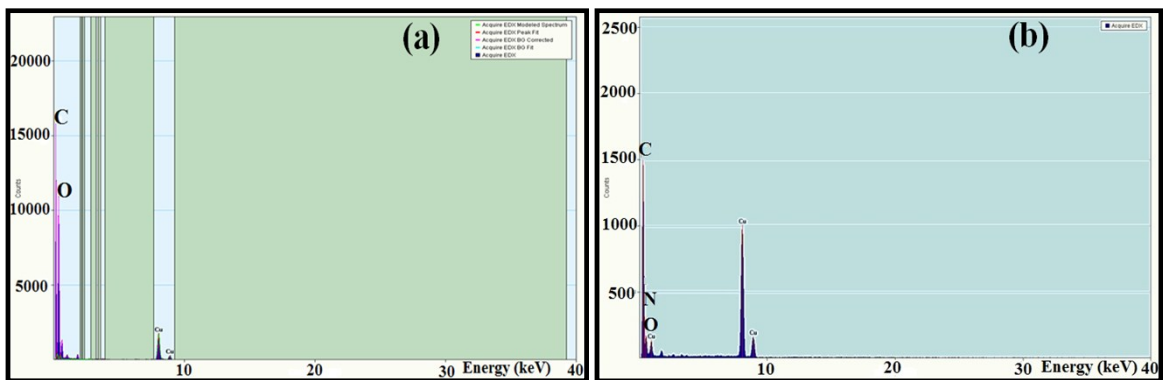

Fig. S3: EDAX spectra of GO (a) and N-Gr (b).

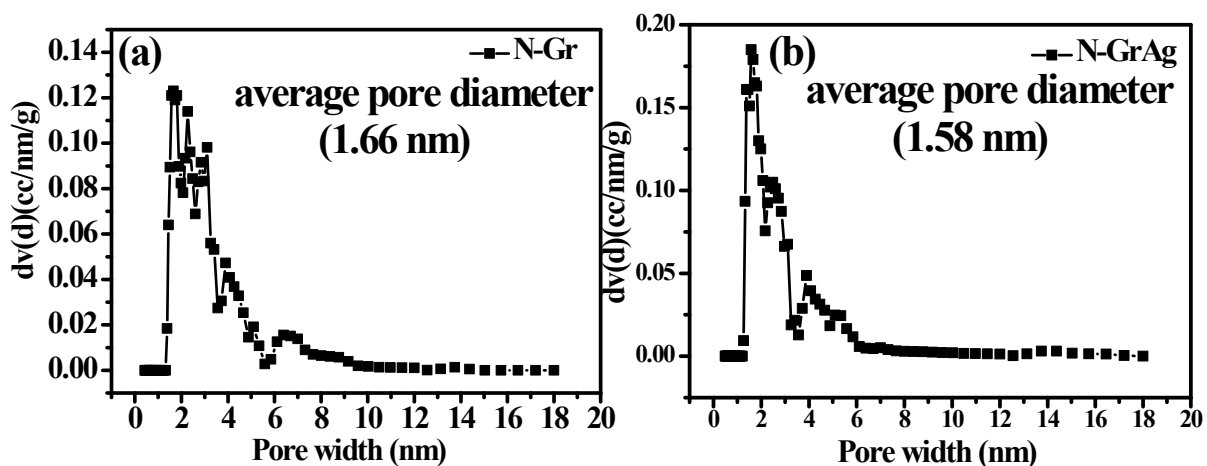

Fig. S4: Average pore diameter of N-Gr (a) and N-GrAg (b).

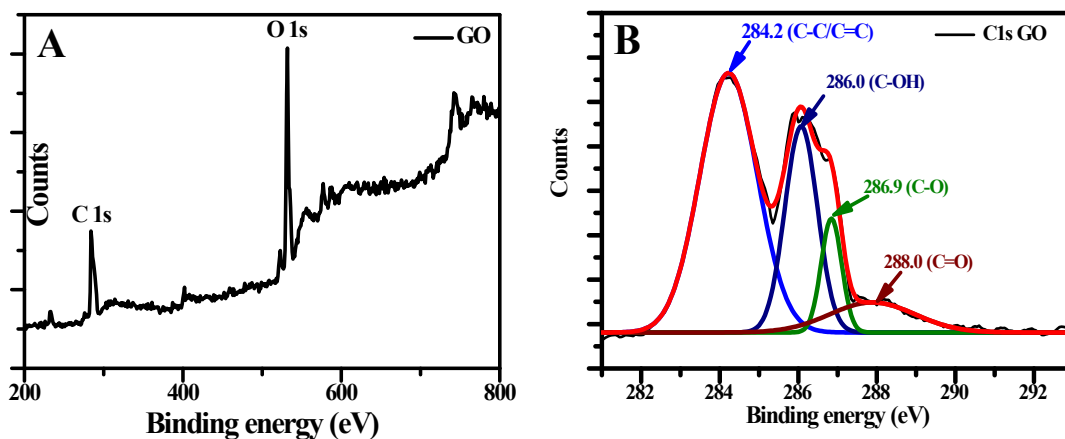

Fig. S5: XPS survey scan of GO – (panel A) and its high resolution C 1s spectrum – (panel B).

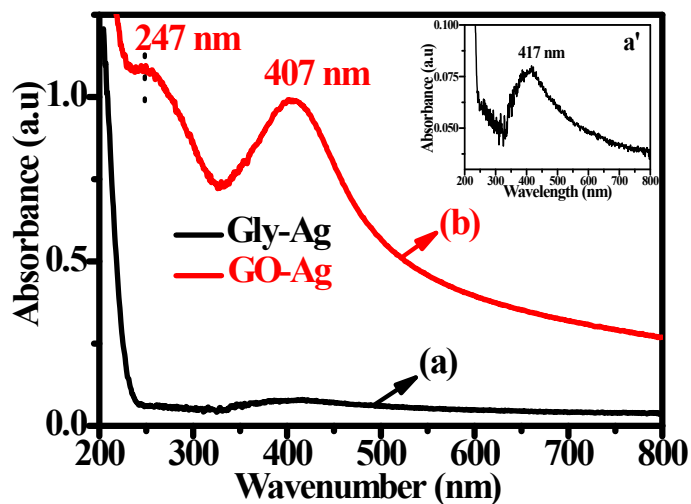

**Fig. S6:** Optical absorption spectra of GO-Ag (a) and Gly-Ag (b). The optical absorption spectrum of Gly-Ag in the magnified absorbance range (b').

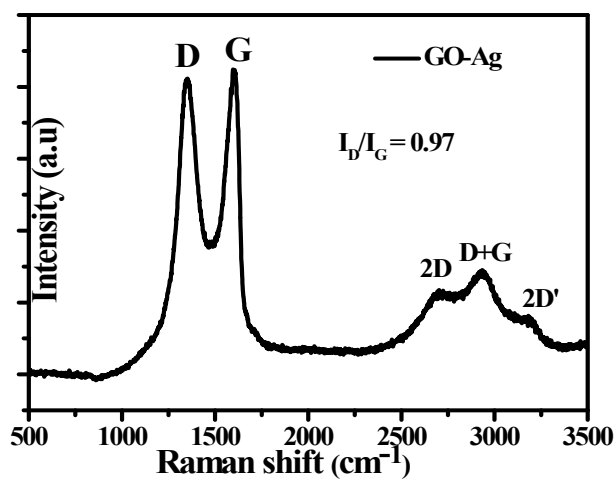

**Fig. S7:** Raman spectrum of GO-Ag.

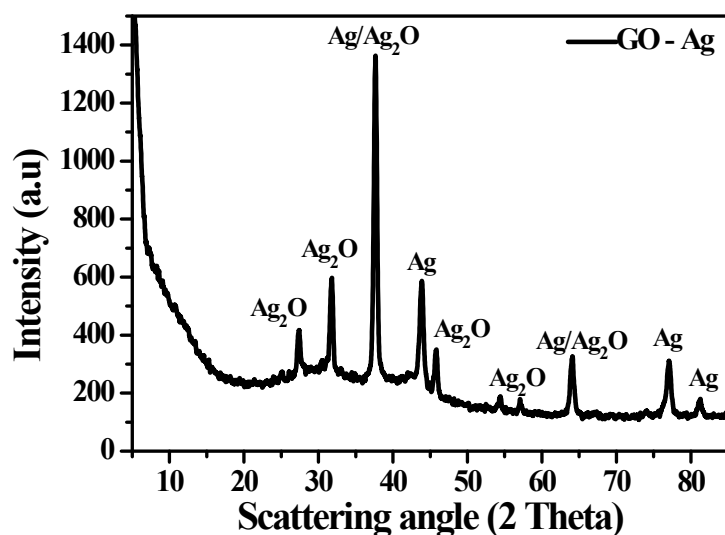

Fig. S8: XRD spectrum of GO-Ag.

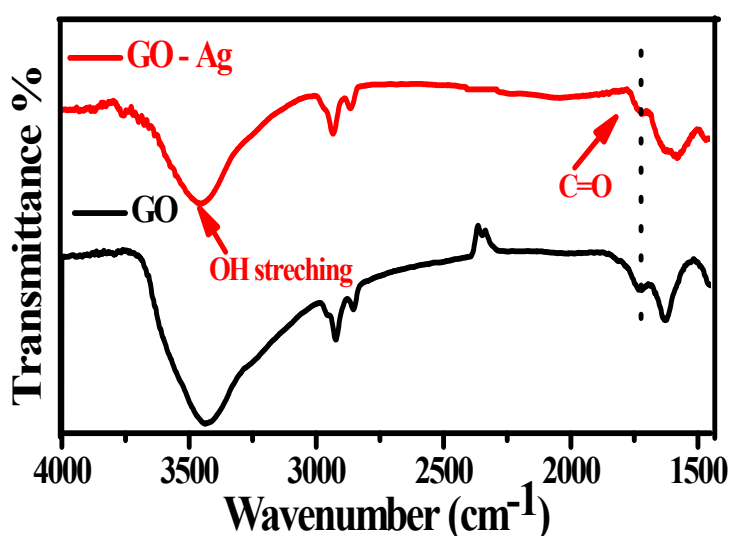

Fig. S9: IR spectra of GO and GO-Ag.

Table S1: Raman spectral data of GO, N-Gr and N-GrAg

| Sample(s) | D band (cm <sup>-1</sup> ) | G band (cm <sup>-1</sup> ) | I <sub>D</sub> /I <sub>G</sub> |
|-----------|----------------------------|----------------------------|--------------------------------|
| GO        | 1354                       | 1605                       | 0.89                           |
| N-Gr      | 1349                       | 1604 (D' 1623)             | 1.00                           |
| N-GrAg    | 1351                       | 1606 (D' 1623)             | 1.03                           |
